# Supplementary material for: Ciliogenesis requires sphingolipid-dependent membrane and axoneme interaction
Source: PubMed Central journal article supplement — Proc Natl Acad Sci U S A. 2022 Jul 27;119(31):e2201096119. doi: 10.1073/pnas.2201096119 (PMC9351462; doi:10.1073/pnas.2201096119), 2022-07-27
Supplement: pnas.2201096119.sapp.pdf [file pnas.2201096119.sapp.pdf]

1  
2  
3  
4  
5  
6  
7  
8  
9  
10  
11  
12  
13  
14  
15  
16  
17  
18  
19  
20  
21  
22  
23  
24  
25  
26  
27  
28  
29  
30  
31

**Supplementary Information for**  
**Ciliogenesis Requires Sphingolipid-dependent Membrane and**  
**Axoneme Interaction**

Dou Wu<sup>1,2,3,4 \*</sup>, Jingying Huang<sup>1,2,3,4 \*</sup>, Hao Zhu<sup>1,2,3,4 \*</sup>, Zhe Chen<sup>1,2,3,4</sup>, Yongping Chai<sup>1,2,3,4</sup>, Jingyi Ke<sup>1,2,3,4</sup>, Kexin Lei<sup>1,2,3,4</sup>, Zhao Peng<sup>5,6</sup>, Ranhao Zhang<sup>1,2</sup>, Xueming Li<sup>1,2</sup>, Kaiyao Huang<sup>5,6</sup>, Wei Li<sup>7</sup>, Chengtian Zhao<sup>8,9,10,11</sup>, and Guangshuo Ou<sup>1,2,3,4 †</sup>.

\*These authors contributed equally to this work  
†Guangshuo Ou

Email: guangshuoou@tsinghua.edu.cn

**This PDF file includes:**

- Figures S1 to S6
- Tables S1 to S2
- Legends for Movie S1 to S2
- Legends for Datasets S1 to S4

**Other supplementary materials for this manuscript include the following:**

- Movies S1 to S2
- Datasets S1 to S4

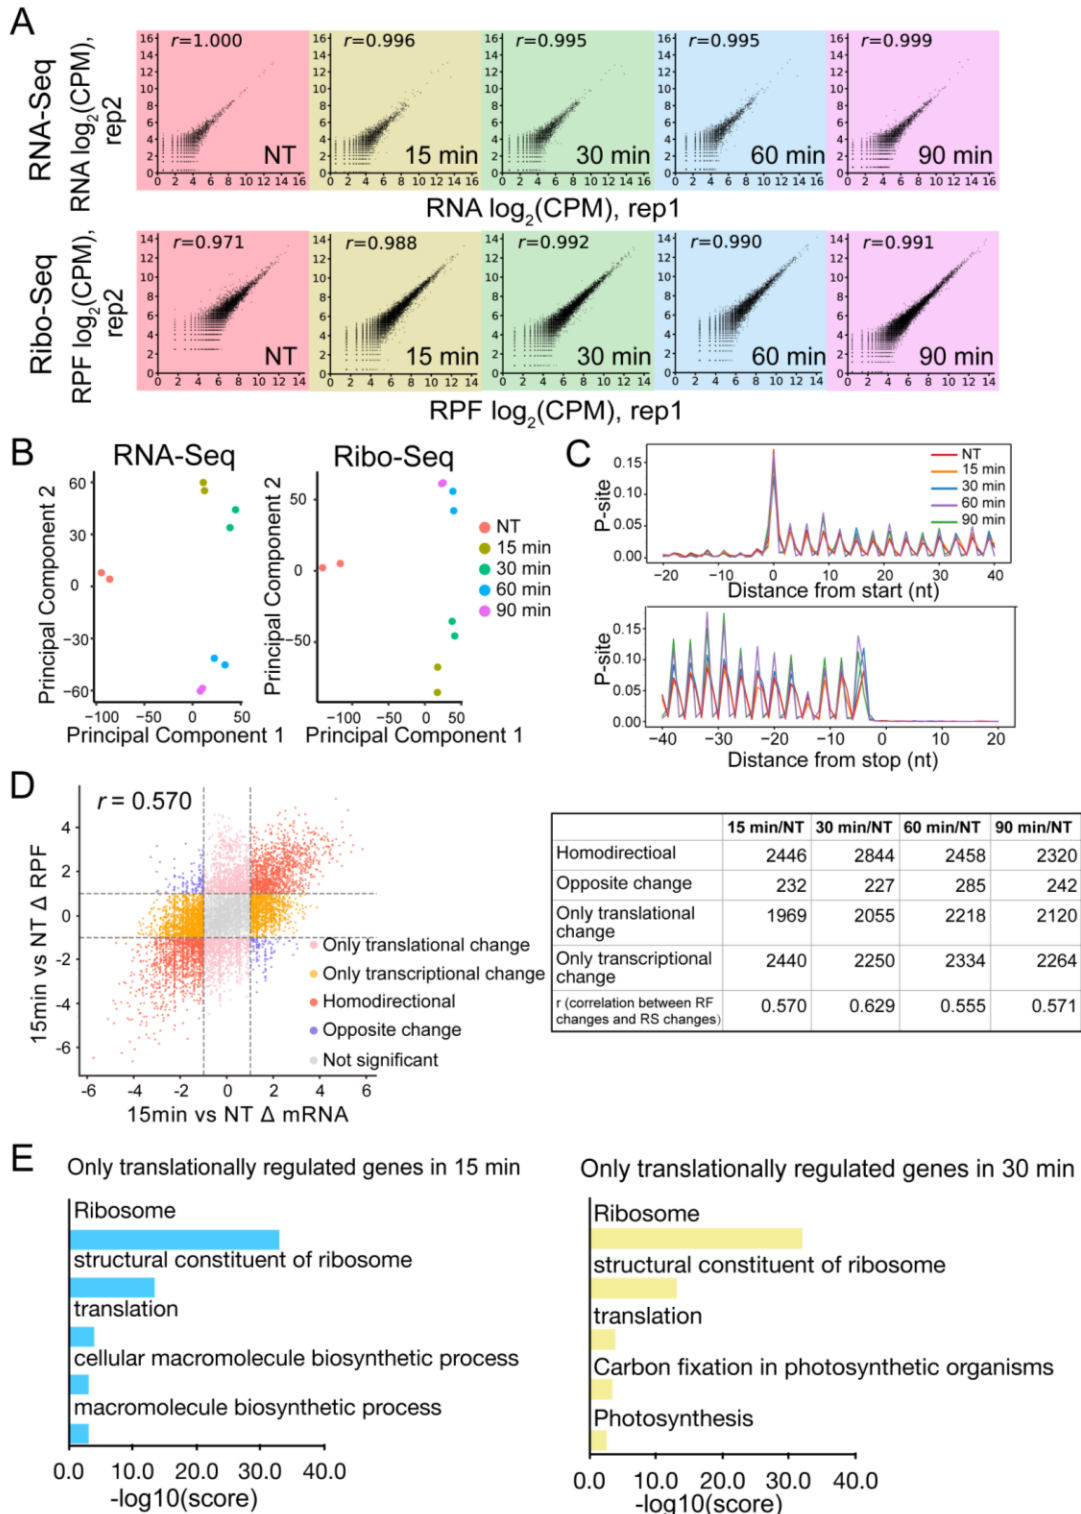

32  
33  
34  
35

**Fig. S1. The quality and reproducibility of RNA-Seq and Ribo-Seq data. (A)** Correlation between two replicates (rep1/2) of RNA-Seq or Ribo-Seq samples. Data are shown as the correlation of log<sub>2</sub>(CPM) in CDS (Ribo-Seq) or exon (RNA-Seq) for expressed genes with CPM >1.

36 Pearson correlation coefficient  $r$  is shown. **(B)** Principal Component Analysis (PCA) in the first  
37 two principal component spaces for RNA-Seq or Ribo-Seq data over all the time points. **(C)** Line  
38 plots of the distance from the 5' end of RPF reads to the annotated start or stop codons for  
39 Ribo-Seq. **(D)** (Left) Correlation between gene expression fold changes with RNA-Seq and  
40 Ribo-Seq data. Colored dots correspond to differentially expressed and translated genes. Pearson  
41 correlation coefficient  $r$  is shown. (Right) The number of differentially expressed and translated  
42 genes at different time points during flagellar regeneration. **(E)** Gene enrichment analysis for the  
43 translational upregulated genes in 15 min and 30 min algae after deflagellation compared with  
44 Non-treated algae.  
45

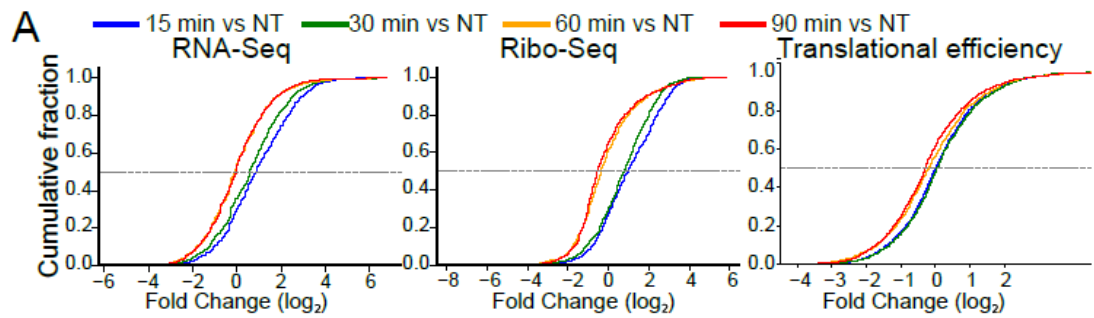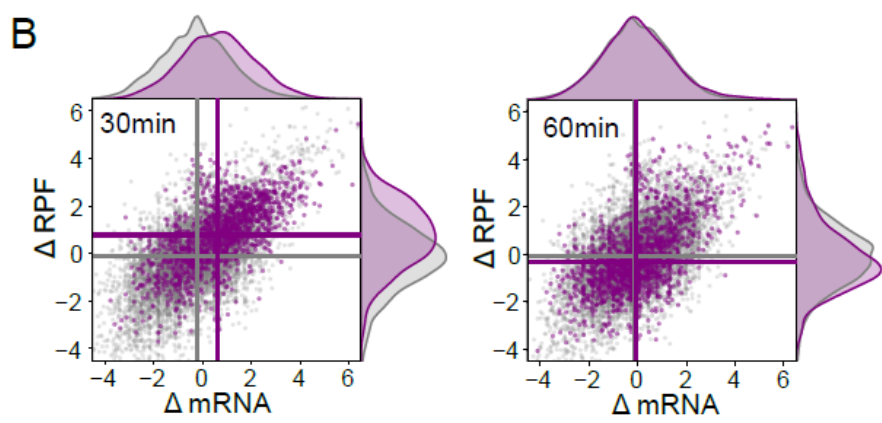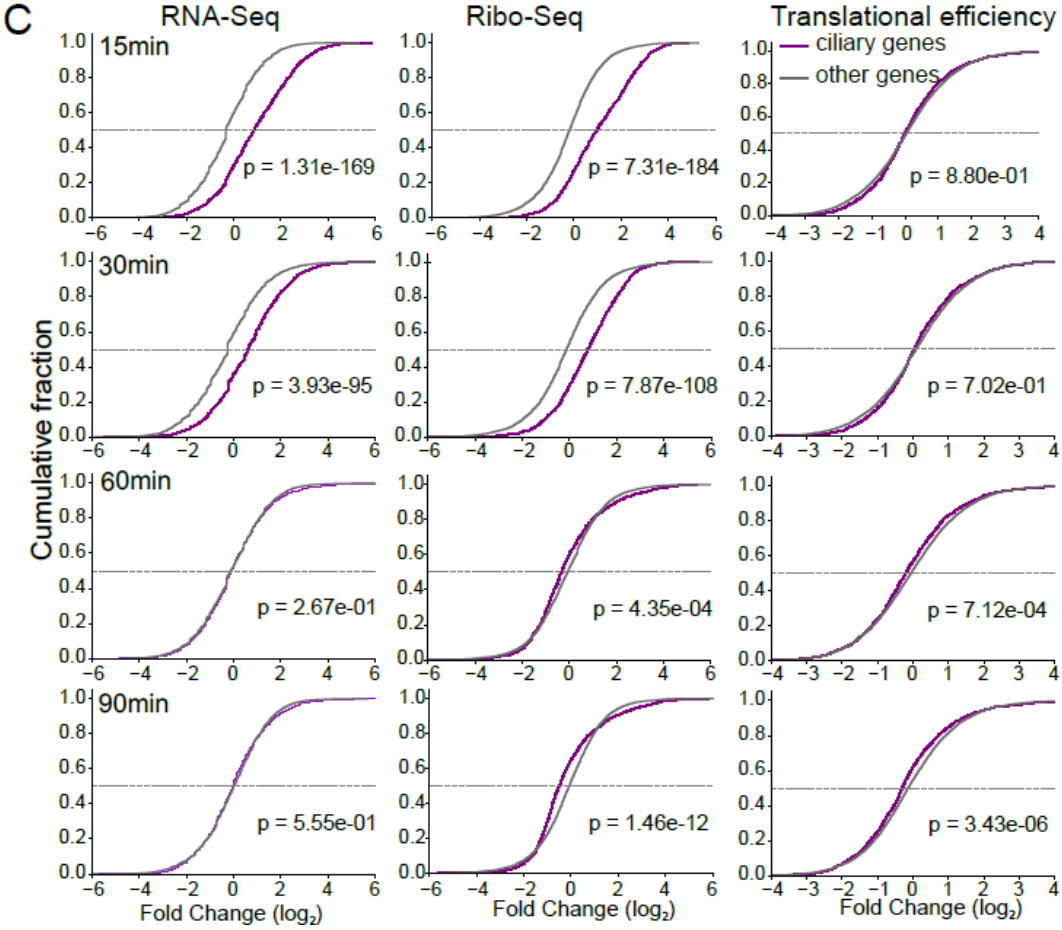

47 **Fig. S2. Transcriptional and translational patterns of the ciliary genes during flagellar**  
48 **regeneration. (A)** Cumulative distributions of log<sub>2</sub>-fold change of RNA-Seq (left), Ribo-Seq  
49 (middle) and translational efficiency (right) at 15 (blue), 30 (green), 60 (orange), and 90 (red) min  
50 after flagellar regeneration for ciliary genes. **(B)** Scatter plots show log<sub>2</sub>-fold change of RPFs  
51 (y-axis) and mRNA (x-axis) at 30 min and 60 min after flagellar regeneration. Ciliary genes are in  
52 purple, and other genes are in gray. Mean values per group are indicated as lines. **(C)** Cumulative  
53 distributions log<sub>2</sub>-fold change of RNA-Seq (left), Ribo-Seq (middle), and translational efficiency  
54 (right) at 15, 30, 60, and 90 min after flagellar regeneration for ciliary genes (purple) and other  
55 genes (grey). P values from rank-sum tests for ciliary genes versus other genes.  
56

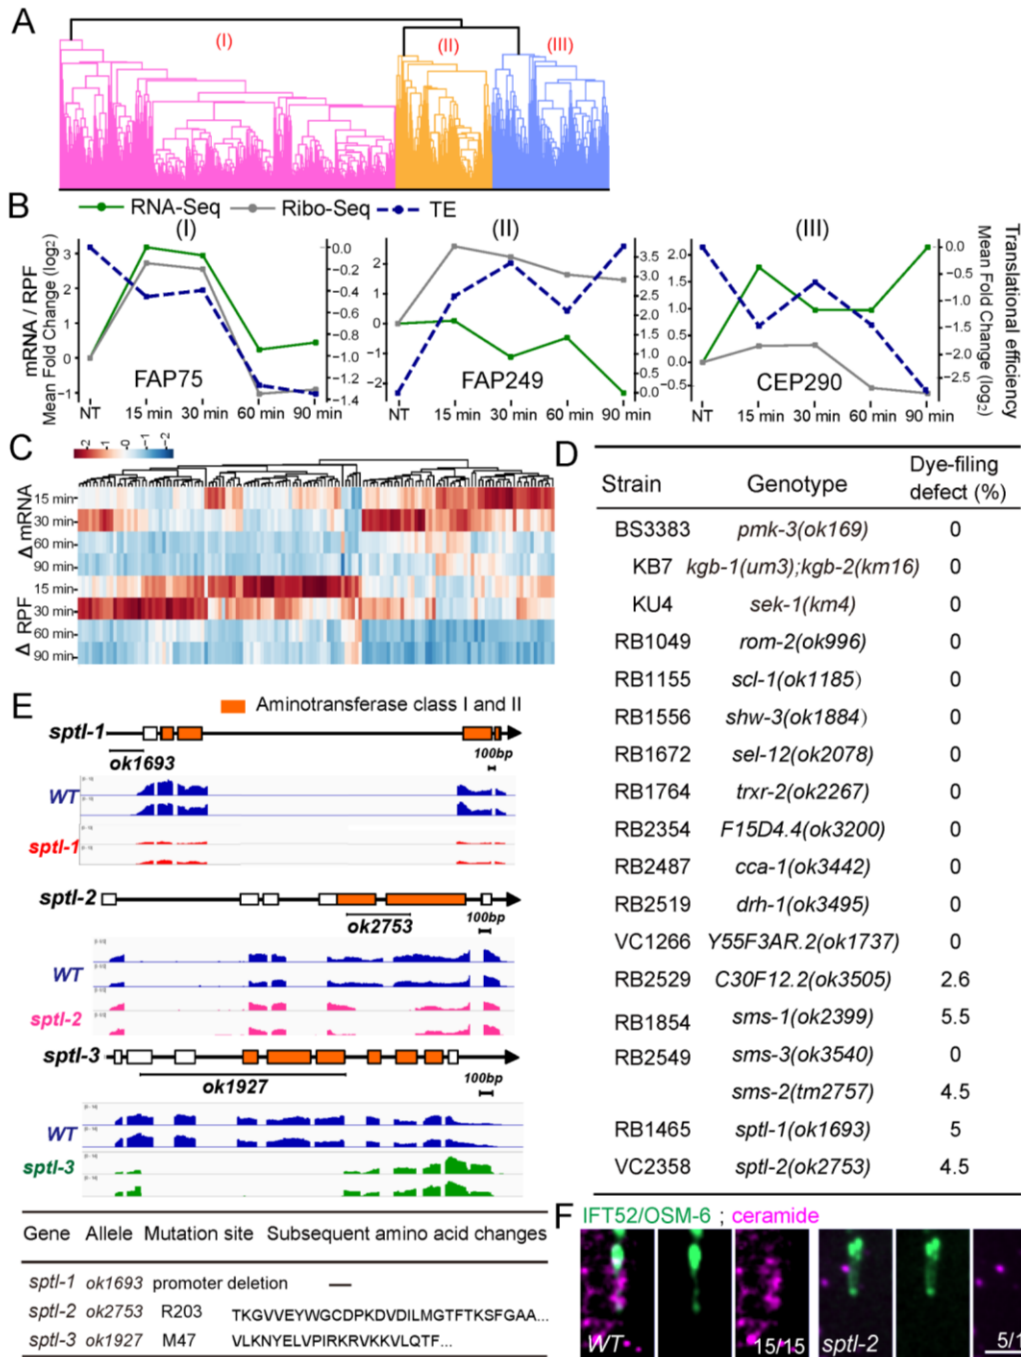

57

58 **Fig. S3. Sphingolipid metabolism genes regulate ciliogenesis.** (A) Hierarchical clustering  
 59 dendrogram of mRNA and RPFs fold changes in all-time points to divide ciliary genes into three  
 60 clusters. (B) The representative plots show the log<sub>2</sub>-fold change of RNA-Seq (green, left axis),  
 61 Ribo-Seq (grey, left axis), and transcriptional efficiency (TE, blue, right axis) of example genes in  
 62 three ciliary clusters. (C) Heatmap shows mRNA and RPFs changes of genes found with a similar  
 63 regulation pattern to ciliary genes cluster I during flagellar regeneration. Columns are genes, and  
 64 rows are time points. The total signal is normalized per column to allow the comparison of patterns.  
 65 (D) Summary of the visual screen for ciliary dye-filing defects in *C. elegans* mutant strains. N = 250

66 - 300 worms from three independent experiments. **(E)** RNA-Seq analysis the transcription of  
67 *sptl-1*, *sptl-2*, *sptl-3*. Mutation sites, amino acid changes are shown below. The deleted sequences  
68 in *sptl-2* (*ok2753*) and *sptl-3* (*ok1927*) result in frameshifts that disrupt the aminotransferase motifs.  
69 The deletion of promoter sequence in *sptl-1* (*ok1693*) reduces the expression of *sptl-1* RNA level.  
70 **(F)** Representative immunocytochemistry images of phasmid cilia in WT *C. elegans* and *sptl-2*  
71 mutant labeled with IFT52/OSM-6::GFP. Magenta, ceramide; green, IFT52/OSM-6. Scale bar, 5  
72  $\mu\text{m}$ . The numbers of cilia used for quantification are shown in the images.

73

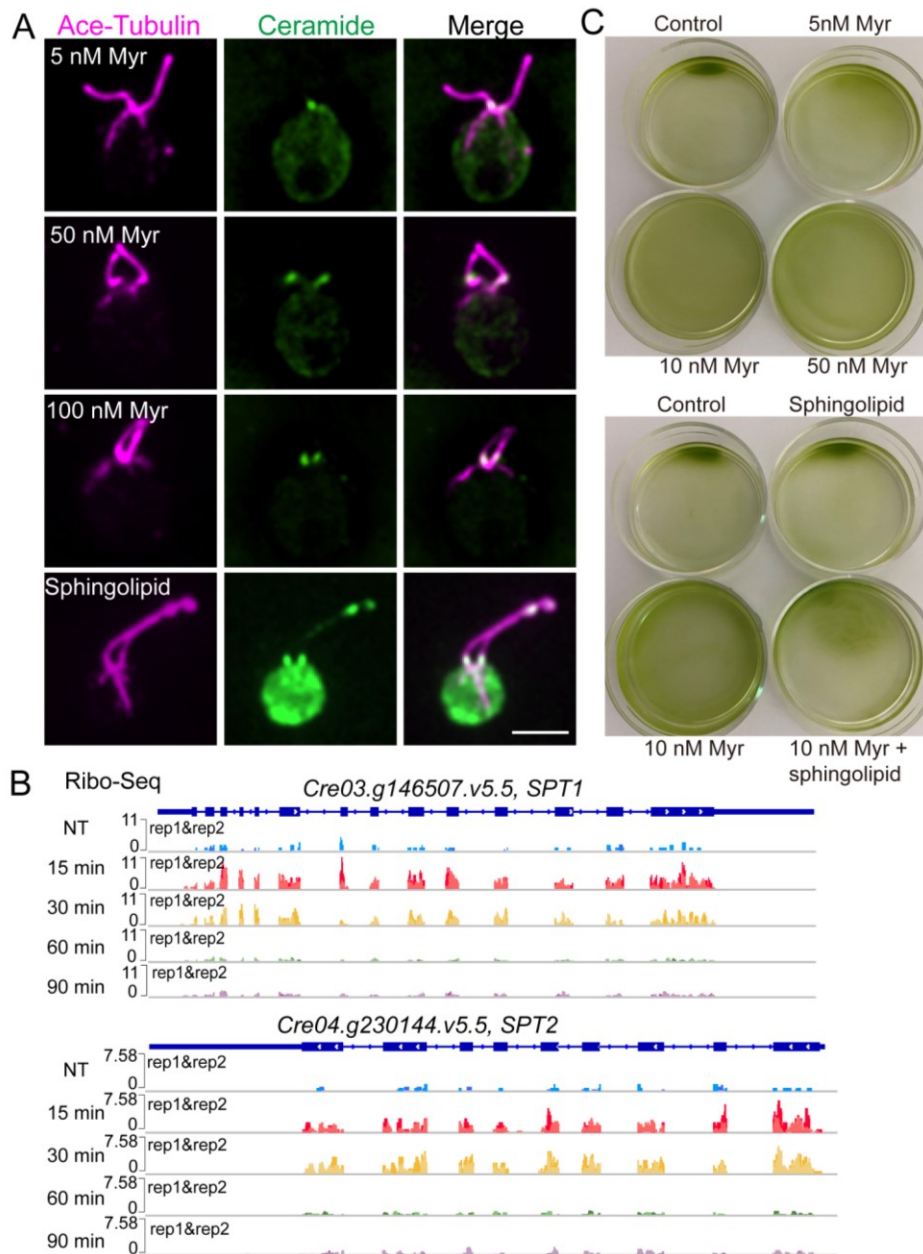

74

75 **Fig. S4. Spingolipids regulate ciliogenesis in *Chlamydomonas*.** (A) Representative  
 76 immunocytochemistry images of *Chlamydomonas* cells treated with ceramide biosynthesis  
 77 inhibitors (5 nM -100 nM myriocin) or with exogenous 2  $\mu$ M sphingolipid mixture (magenta,  
 78 acetylated tubulin; green, ceramide). Scale bar, 5  $\mu$ m. (B) IGV plots show RPFs levels for *SPT1*  
 79 and *SPT2*. (C) Phototaxis motility assay with *Chlamydomonas* incubated with 0-50 nM myriocin  
 80 (myr) with or without exogenous 2  $\mu$ M sphingolipid mixture, N = 3 from three independent  
 81 experiments.



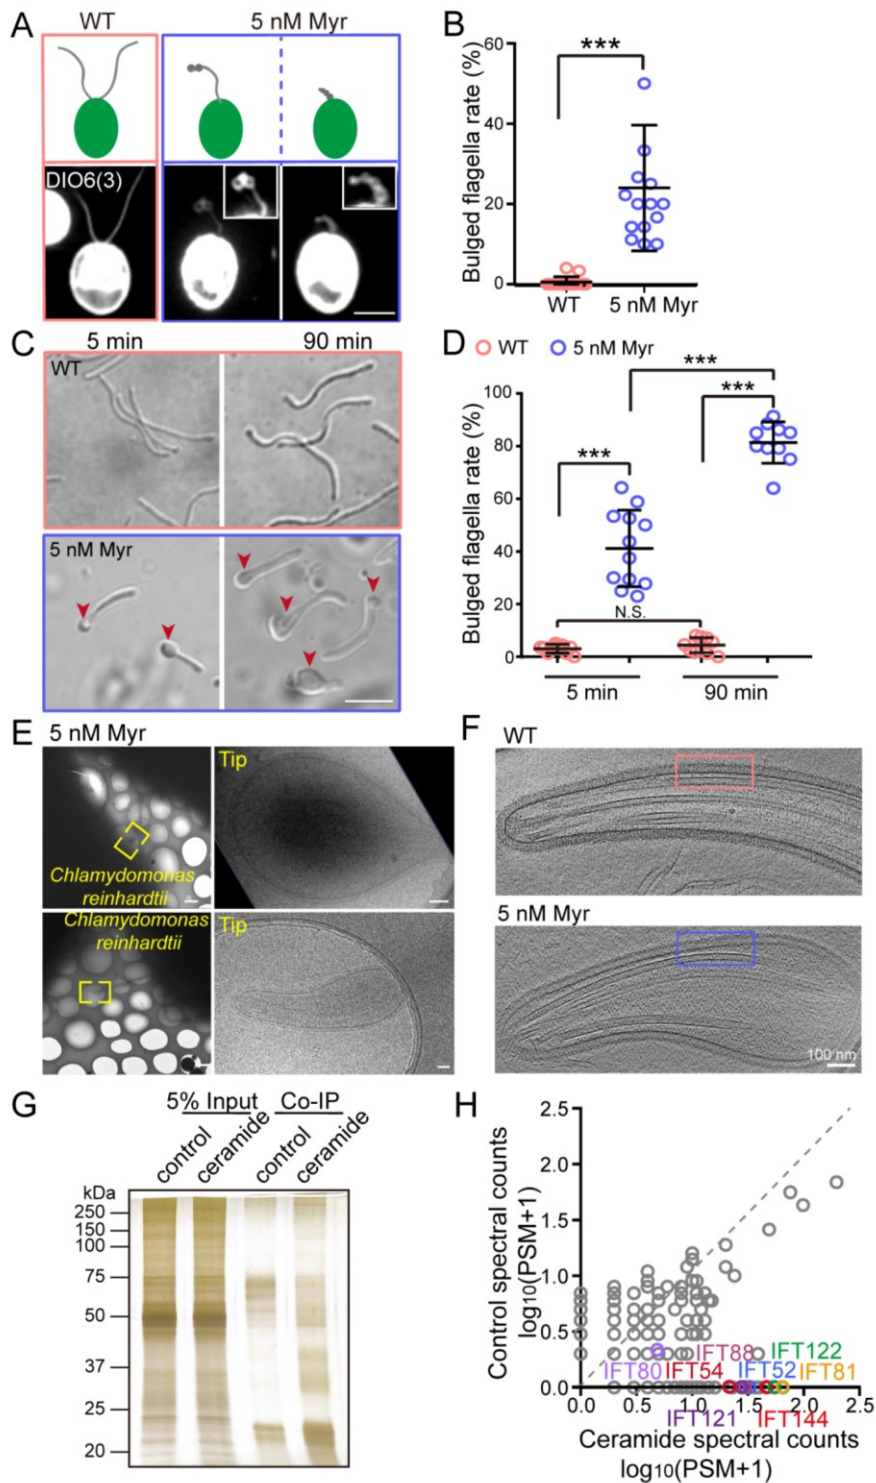

82

83 **Fig. S5. Loss of ceramide caused bulged flagella.** (A) Representative images of  
 84 *Chlamydomonas* cells treated with or without ceramide biosynthesis inhibitors (5 nM myriocin)  
 85 labeled with the lipid dye Dioc6(3). Scale bar, 5  $\mu\text{m}$ . (B) Quantifications in *Chlamydomonas* cells

86 treated with or without ceramide biosynthesis inhibitors (5 nM myriocin) labeled with the lipid dye  
87 Dioc6(3). N= 14 independent fields from three independent experiences were used for statistical  
88 analysis. Values, mean  $\pm$  SD for combined cell populations. Statistical significances were  
89 calculated by the Student's t-test using the means of of biological replicates, \*\*\*p < 0.001. **(C)**  
90 Representative images of *Chlamydomonas* flagella treated with or without ceramide biosynthesis  
91 inhibitors (5 nM myriocin). Scale bar, 5  $\mu$ m. **(D)** Bulged flagella rates in *Chlamydomonas* cells  
92 treated with or without ceramide biosynthesis inhibitors (5 nM myriocin). N > 10 independent fields  
93 from three independent experiences were used for statistical analysis. Values, mean  $\pm$  SD.  
94 Statistical significances were calculated by the Student's t-test using the means of of biological  
95 replicates, \*\*\*p < 0.001. **(E)** Cryo-TEM images show the representative flagella in 5 nM Myr (Left).  
96 Scale bars, 500 nm. High-magnification view of flagellar tips using cryo-TEM (right). Scale bars,  
97 100 nm. **(F)** Cryo-ET images of the representative cilia in WT and 5 nM Myr. Scale bars, 100 nm.  
98 The boxes show the high-magnification images in Fig. 5E and F. **(G)** Protein interacting with  
99 ceramide was isolated using ceramide beads as shown in Fig. 6A. Protein was then separated by  
100 SDS-PAGE and silver-stained. **(H)** Mass spectrometric analysis of potential ceramide binding  
101 proteins by biotin-linked ceramide streptavidin agarose beads using the lysate from purified  
102 *Chlamydomonas* flagella. The plot compares proteins co-precipitated with control beads (y-axis)  
103 and ceramide beads (x-axis), the colorful dots represent IFT proteins (see Dataset S4 and Fig.  
104 6B).  
105

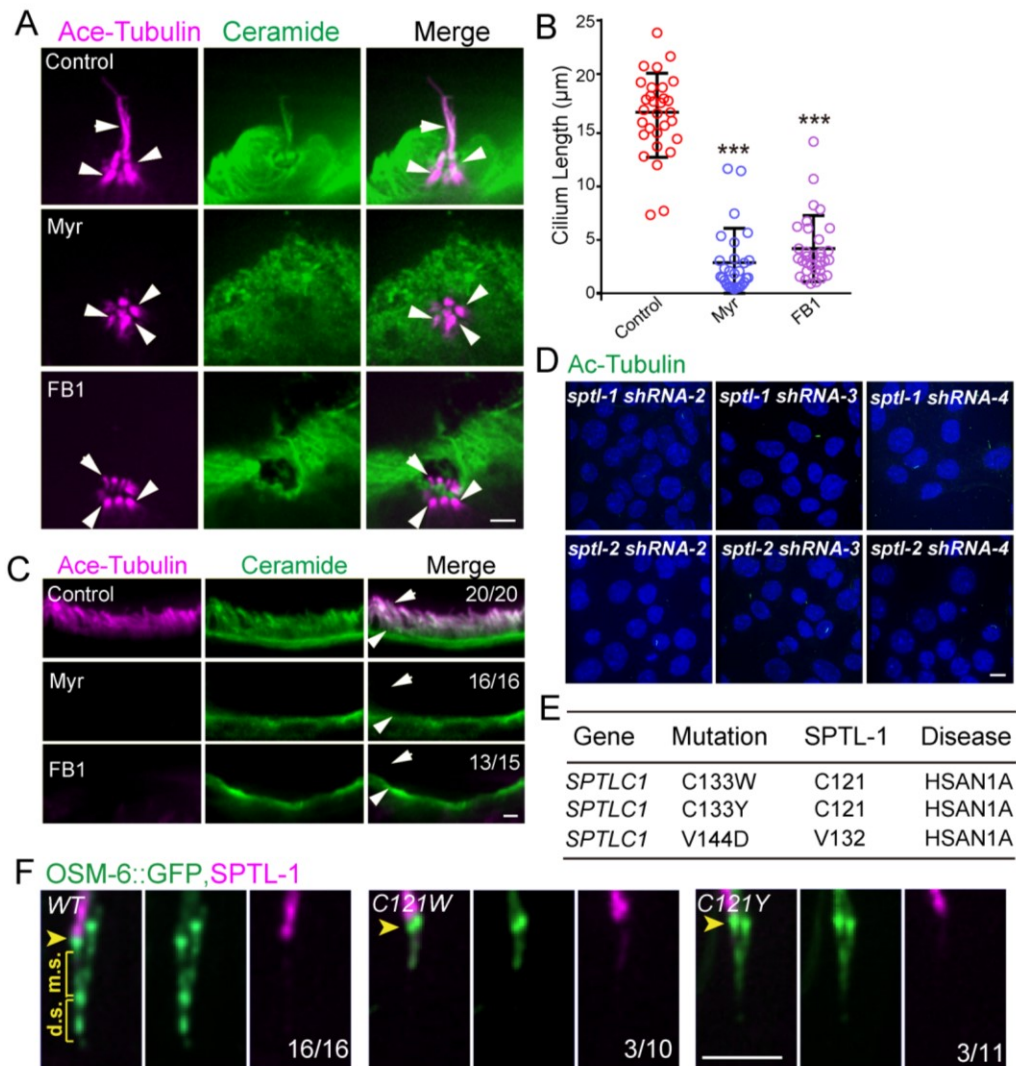

106

107 **Fig. S6. Spingolipids regulate ciliogenesis in vertebrate cells.** (A) Representative  
 108 immunocytochemistry images in zebrafish olfactory placode treated with ceramide biosynthesis  
 109 inhibitors (25 μM myriocin, 250 μM FB1, or DMSO) (magenta, acetylated tubulin; green, ceramide)  
 110 for four days. Arrowheads, cilia. Scale bar, 5 μm. (B) Quantifications in zebrafish olfactory  
 111 placode treated with ceramide biosynthesis inhibitors (25 μM myriocin, 250 μM FB1, or DMSO)  
 112 (magenta, acetylated tubulin; green, ceramide) for four days. N = 29-32 animals from three  
 113 independent replicates. Statistical significances were calculated by the Student's t-test using the  
 114 means of biological replicates, \*\*\* P < 0.001. (C) Representative immunocytochemistry and  
 115 quantifications of zebrafish lateral line neuromasts that were treated for four days with ceramide  
 116 biosynthesis inhibitors (25 μM myriocin, 250 μM FB1 or DMSO) (magenta, acetylated tubulin;  
 117 green, ceramide). Arrowheads, olfactory epithelium. Arrow, cilia. Scale bar, 5 μm. The numbers of  
 118 zebrafish used for quantification are shown in the bars. (D) Representative immunocytochemistry  
 119 images in IMCD3 cells transfected with *sptlc1* or *sptlc2* siRNA (green, acetylated tubulin; blue,  
 120 DAPI) for 48 hours. Scale bar, 5 μm. N = 115 - 200 cells from three independent experiments. (E)  
 121 Disease-associated mutations in SPTLC1. Both mutations are dominant in human diseases. (F)  
 122 Phasmid cilia in *C. elegans* were labeled with OSM-6::GFP and SPTL-1(C121W)::wrmScarlet (a

123 red fluorescence protein), SPTL-1(C121Y)::wrmScarlet. Arrowheads, the ciliary base, and  
124 transition zone. Scale bar, 5  $\mu$ m. N = 10-16 animals from two independent replicates.

125

**Table S1. Strains in this study.**

| <b>Experimental Models: Organisms/Strains</b>   | <b>Source</b>                         | <b>Identifier or Catalog Number</b>              |
|-------------------------------------------------|---------------------------------------|--------------------------------------------------|
| IMCD3 cells ( <i>M. musculus</i> )              | ATCC                                  | CRL-2123                                         |
| CC-125 wild type mt+ ( <i>C. reinhardtii</i> )  | Chlamydomonas Resource Center         | N/A                                              |
| CrIFT46-YFP ( <i>C. reinhardtii</i> )           | Kaiyao Huang Lab                      | N/A                                              |
| Tübingen (TU) wild type ( <i>D. rerio</i> )     | ZFIN                                  | N/A                                              |
| N2 ( <i>C. elegans</i> )                        | Caenorhabditis Genetics Center        | N/A                                              |
| RB1465: sptl-1(ok1693) II ( <i>C. elegans</i> ) | Caenorhabditis Genetics Center        | WB Strain: RB1465;<br>WormBase:<br>WBVar00092899 |
| VC2358: sptl-2(ok2753) V ( <i>C. elegans</i> )  | Caenorhabditis Genetics Center        | WB Strain: VC2358;<br>WormBase:<br>WBVar00093853 |
| RB1579: sptl-3(ok1927) V ( <i>C. elegans</i> )  | Caenorhabditis Genetics Center        | WB Strain: RB1579;<br>WormBase:<br>WBVar00093122 |
| RB1036: hyl-1(ok976) IV ( <i>C. elegans</i> )   | Caenorhabditis Genetics Center        | WB Strain: RB1036;<br>WormBase:<br>WBVar00092247 |
| RB1498: hyl-2(ok1766) X ( <i>C. elegans</i> )   | Caenorhabditis Genetics Center        | WB Strain: RB1498;<br>WormBase:<br>WBVar00092968 |
| VC747: lagr-1(gk327) I ( <i>C. elegans</i> )    | Caenorhabditis Genetics Center        | WB Strain: VC747;<br>WormBase:<br>WBVar00145734  |
| VC765: lagr-1(gk331) I ( <i>C. elegans</i> )    | Caenorhabditis Genetics Center        | WB Strain: VC765;<br>WormBase:                   |
| RB782: asah-2 (ok564) II ( <i>C. elegans</i> )  | Caenorhabditis Genetics Center        | WB Strain: RB782;<br>WormBase:<br>WBVar00091850  |
| <i>asah-1(tm495)</i> I ( <i>C. elegans</i> )    | National Bioresource Project of Japan | WormBase:<br>WBVar00249537                       |

|                                                      |                                       |                                                  |
|------------------------------------------------------|---------------------------------------|--------------------------------------------------|
| VC916: sphk-1(ok1097) II ( <i>C. elegans</i> )       | Caenorhabditis Genetics Center        | WB Strain: VC916;<br>WormBase:<br>WBVar00092366  |
| VC242: spl-2(ok490) V ( <i>C. elegans</i> )          | Caenorhabditis Genetics Center        | WB Strain: VC242;<br>WormBase:<br>WBVar00091778  |
| RB1203: cerk-1 (ok1252) I ( <i>C. elegans</i> )      | Caenorhabditis Genetics Center        | WB Strain: RB1203;<br>WormBase:<br>WBVar00092498 |
| asm-1(tm5023) II ( <i>C. elegans</i> )               | National Bioresource Project of Japan | WormBase:<br>WBVar00317302                       |
| asm-2(tm3746) X ( <i>C. elegans</i> )                | National Bioresource Project of Japan | WormBase:<br>WBVar00252354                       |
| RB1487: asm-3(ok1744) IV ( <i>C. elegans</i> )       | Caenorhabditis Genetics Center        | WB Strain: RB1487;<br>WormBase:<br>WBVar00092946 |
| ttm-5(tm6585) I ( <i>C. elegans</i> )                | National Bioresource Project of Japan | WormBase:<br>WBVar02125250                       |
| RB1854: sms-1(ok2399) IV ( <i>C. elegans</i> )       | Caenorhabditis Genetics Center        | WB Strain: RB1854;<br>WormBase:<br>WBVar00093548 |
| sms-2(tm2757) X ( <i>C. elegans</i> )                | National Bioresource Project of Japan | WormBase:<br>WBVar00251598                       |
| RB2549: sms-3(ok3540) III ( <i>C. elegans</i> )      | Caenorhabditis Genetics Center        | WB Strain: RB2549;<br>WormBase:<br>WBVar00094520 |
| BS3383: pmk-3(ok169) IV ( <i>C. elegans</i> )        | Caenorhabditis Genetics Center        | WB Strain: BS3383;<br>WormBase:<br>WBVar00091488 |
| KB7: kgb-1(um3) kgb-2(km16) IV ( <i>C. elegans</i> ) | Caenorhabditis Genetics Center        | WB Strain: KB7;<br>WormBase:<br>WBVar00274912    |
| KU4: sek-1(km4) X ( <i>C. elegans</i> )              | Caenorhabditis Genetics Center        | WB Strain: KU4;<br>WormBase:<br>WBVar00088241    |

|                                                                                                                       |                                |                                                            |
|-----------------------------------------------------------------------------------------------------------------------|--------------------------------|------------------------------------------------------------|
| RB1049: rom-2(ok996) III ( <i>C. elegans</i> )                                                                        | Caenorhabditis Genetics Center | WB Strain: RB1049;<br>WormBase:<br>WBVar00092267           |
| RB1155: scl-1(ok1185) IV ( <i>C. elegans</i> )                                                                        | Caenorhabditis Genetics Center | WB Strain: RB1155;<br>WormBase:<br>WBVar00092441           |
| RB1556: shw-3(ok1884) V ( <i>C. elegans</i> )                                                                         | Caenorhabditis Genetics Center | WB Strain: RB1556;<br>WormBase:<br>WBVar00093080           |
| RB1672: sel-12(ok2078) X ( <i>C. elegans</i> )                                                                        | Caenorhabditis Genetics Center | WB Strain: RB1672;<br>WormBase:<br>WBVar00093263           |
| RB1764: trxr-2(ok2267) III ( <i>C. elegans</i> )                                                                      | Caenorhabditis Genetics Center | WB Strain: RB1764;<br>WormBase:<br>WBVar00093428           |
| RB1919: sms-5(ok2498) II ( <i>C. elegans</i> )                                                                        | Caenorhabditis Genetics Center | WB Strain: RB1919;<br>WormBase:<br>WBVar00093634           |
| RB2354: F15D4.4(ok3200) II ( <i>C. elegans</i> )                                                                      | Caenorhabditis Genetics Center | WB Strain: RB2354;<br>WormBase:<br>WBVar00094267           |
| RB2487: cca-1(ok3442) X ( <i>C. elegans</i> )                                                                         | Caenorhabditis Genetics Center | WB Strain: RB2487;<br>WormBase:<br>WBVar00094445           |
| RB2519: drh-1(ok3495) IV ( <i>C. elegans</i> )                                                                        | Caenorhabditis Genetics Center | WB Strain: RB2519;<br>WormBase:<br>WBVar00094484           |
| VC1266: Y55F3AR.2(ok1737) IV ( <i>C. elegans</i> )                                                                    | Caenorhabditis Genetics Center | WB Strain: VC1266;<br>WormBase:<br>WBVar00092940           |
| RB2529: C30F12.2(ok3505) I ( <i>C. elegans</i> )                                                                      | Caenorhabditis Genetics Center | WB Strain: RB2529;<br>WormBase:<br>WBVar00094494           |
| SP2101: ncl-1(e1865) unc-36(e251) III;<br>osm-6(p811) V; mnl17[Posm-6::osm-6::GFP<br>unc-36(+)] ( <i>C. elegans</i> ) | Caenorhabditis Genetics Center | WB Strain: SP2101;<br>WormBase:<br>WBTransgene000010<br>04 |
| GOU3788: sptl-1(ok1693) II;<br>mnl17[Posm-6::osm-6::GFP unc-36(+)]( <i>C. elegans</i> )                               | This paper                     | N/A                                                        |

|                                                                                                                  |            |     |
|------------------------------------------------------------------------------------------------------------------|------------|-----|
| GOU3897: sptl-2(ok2753) V;<br>mnIs17[Posm-6::osm-6::GFP unc-36(+)]( <i>C. elegans</i> )                          | This paper | N/A |
| GOU3789: sptl-1(ok1693) II; sptl-2(ok2753) V;<br>mnIs17[Posm-6::osm-6::GFP unc-36(+)]( <i>C. elegans</i> )       | This paper | N/A |
| GOU3787: sptl-3(ok1927) V;<br>mnIs17[Posm-6::osm-6::GFP unc-36(+)]( <i>C. elegans</i> )                          | This paper | N/A |
| GOU3813: sptl-1(ok1693) II; sptl-3(ok1927) V;<br>mnIs17[Posm-6::osm-6::GFP unc-36(+)]( <i>C. elegans</i> )       | This paper | N/A |
| GOU3798: hyl-1(ok976) IV;<br>mnIs17[Posm-6::osm-6::GFP unc-36(+)]( <i>C. elegans</i> )                           | This paper | N/A |
| GOU3795: hyl-2(ok1766) X;<br>mnIs17[Posm-6::osm-6::GFP unc-36(+)]( <i>C. elegans</i> )                           | This paper | N/A |
| GOU3800: lagr-1(gk331) I;<br>mnIs17[Posm-6::osm-6::GFP unc-36(+)]( <i>C. elegans</i> )                           | This paper | N/A |
| GOU3824: lagr-1(gk331) I; hyl-2(ok1766) X;<br>mnIs17[Posm-6::osm-6::GFP unc-36(+)]( <i>C. elegans</i> )          | This paper | N/A |
| GOU3796: asah-2 (ok564) II;<br>mnIs17[Posm-6::osm-6::GFP unc-36(+)]( <i>C. elegans</i> )                         | This paper | N/A |
| GOU3799: sphk-1(ok1097) II;<br>mnIs17[Posm-6::osm-6::GFP unc-36(+)]( <i>C. elegans</i> )                         | This paper | N/A |
| GOU3794: cerk-1 (ok1252) I;<br>mnIs17[Posm-6::osm-6::GFP unc-36(+)]( <i>C. elegans</i> )                         | This paper | N/A |
| GOU4202: mnIs17[Posm-6::osm-6::GFP unc-36(+)];casEX6126[Pdyf-1::sptl-1(C121W)::wrmScarlet] ( <i>C. elegans</i> ) | This paper | N/A |
| GOU4203: mnIs17[Posm-6::osm-6::GFP unc-36(+)];casEX6127[Pdyf-1::sptl-1(C121Y)::wrmScarlet] ( <i>C. elegans</i> ) | This paper | N/A |

127  
128



**Table S2.** Plasmids and Primers in this study.

| <b>Experimental Models: Organisms/Strains</b>                                                                                                                                                         | <b>Source</b> | <b>Identifier or Catalog Number</b> |
|-------------------------------------------------------------------------------------------------------------------------------------------------------------------------------------------------------|---------------|-------------------------------------|
| Plasmid: pcDNA3.1-SPTLC1::HA                                                                                                                                                                          | This paper    | N/A                                 |
| Plasmid: pcDNA3.1-SPTLC1(C133W)::HA                                                                                                                                                                   | This paper    | N/A                                 |
| Plasmid: pcDNA3.1-SPTLC1(C133Y)::HA                                                                                                                                                                   | This paper    | N/A                                 |
| Plasmid: pcDNA3.1-SPTLC1(V144D)::HA                                                                                                                                                                   | This paper    | N/A                                 |
| Plasmid: pDONR-Pdyf-1::sptl-1::wrmScarlet                                                                                                                                                             | This paper    | N/A                                 |
| Plasmid:<br>pDONR-Pdyf-1::sptl-1(C121W)::wrmScarlet                                                                                                                                                   | This paper    | N/A                                 |
| Plasmid:<br>pDONR-Pdyf-1::sptl-1(C121Y)::wrmScarlet                                                                                                                                                   | This paper    | N/A                                 |
| Custom Glycerol-mouse shRNA library: pLKO mouse SPTLC1 shRNA                                                                                                                                          | Sigma         | TRCN0000103400                      |
| Custom Glycerol-mouse shRNA library: pLKO mouse SPTLC1 shRNA                                                                                                                                          | Sigma         | TRCN0000103402                      |
| Custom Glycerol-mouse shRNA library: pLKO mouse SPTLC1 shRNA                                                                                                                                          | Sigma         | TRCN0000103403                      |
| Custom Glycerol-mouse shRNA library: pLKO mouse SPTLC2 shRNA                                                                                                                                          | Sigma         | TRCN0000103170                      |
| Custom Glycerol-mouse shRNA library: pLKO mouse SPTLC2 shRNA                                                                                                                                          | Sigma         | TRCN0000103171                      |
| Custom Glycerol-mouse shRNA library: pLKO mouse SPTLC2 shRNA                                                                                                                                          | Sigma         | TRCN0000103173                      |
| Ribosome profiling: Preadenylated and 3'-blocked linker:<br>5rApp/CTGTAGGCACCATCAAT/3ddC/ (IDT)                                                                                                       | This paper    | N/A                                 |
| Ribosome profiling: Reverse transcription primer:<br>5'-(Phos)-AGATCGGAAGAGCGTCGTGTAGG GAAAGA<br><br>GTGTAGATCTCGGTGGTTCGC-(SpC18)-CAC TCA-(SpC18)-TTCAGACGTGTGCTCTTCCG ATCTATTGAT<br><br>GGTGCCTACAG | This paper    | N/A                                 |

|                                                                                                                                    |            |     |
|------------------------------------------------------------------------------------------------------------------------------------|------------|-----|
| Ribosome profiling: library amplification:<br>AATGATACGGCGACCACCGAGATCTACAC                                                        | This paper | N/A |
| Ribosome profiling: library amplification index primer:<br>CAAGCAGAAGACGGCATAACGAGATACATC<br>GGTGACTGGAGTTCAGACGTGTGCTCTTC<br>CG   | This paper | N/A |
| Ribosome profiling: library amplification index primer:<br>CAAGCAGAAGACGGCATAACGAGATTGGTC<br>AGTGACTGGAGTTCAGACGTGTGCTCTTC<br>CG   | This paper | N/A |
| Ribosome profiling: library amplification index primer:<br>CAAGCAGAAGACGGCATAACGAGATCACTG<br>TGTGACTGGAGTTCAGACGTGTGCTCTTCC<br>G   | This paper | N/A |
| Ribosome profiling: library amplification index primer:<br>CAAGCAGAAGACGGCATAACGAGATATTGG<br>CGTGACTGGAGTTCAGACGTGTGCTCTTC<br>CG   | This paper | N/A |
| Ribosome profiling: library amplification index primer:<br>CAAGCAGAAGACGGCATAACGAGATGATCT<br>GGTGACTGGAGTTCAGACGTGTGCTCTTC<br>CG   | This paper | N/A |
| Ribosome profiling: library amplification index primer:<br>CAAGCAGAAGACGGCATAACGAGATTACAA<br>GGTGACTGGAGTTCAGACGTGTGCTCTTC<br>CG   | This paper | N/A |
| Ribosome profiling: library amplification index primer:<br>CAAGCAGAAGACGGCATAACGAGATTGTTG<br>ACTGTGACTGGAGTTCAGACGTGTGCTCTT<br>CCG | This paper | N/A |
| Ribosome profiling: library amplification index primer:<br>CAAGCAGAAGACGGCATAACGAGATACGGA<br>ACTGTGACTGGAGTTCAGACGTGTGCTCTT<br>CCG | This paper | N/A |

|                                                                                                                                    |            |     |
|------------------------------------------------------------------------------------------------------------------------------------|------------|-----|
| Ribosome profiling: library amplification index primer:<br>CAAGCAGAAGACGGCATAACGAGATTCTGA<br>CATGTGACTGGAGTTCAGACGTGTGCTCTT<br>CCG | This paper | N/A |
| Ribosome profiling: library amplification index primer:<br>CAAGCAGAAGACGGCATAACGAGATCGGGA<br>CGGGTACTGGAGTTCAGACGTGTGCTCT<br>TCCG  | This paper | N/A |
| Ribosome profiling: library amplification index primer:<br>CAAGCAGAAGACGGCATAACGAGATGTGCG<br>GACGTGACTGGAGTTCAGACGTGTGCTCT<br>TCCG | This paper | N/A |
| Ribosome profiling: library amplification index primer:<br>CAAGCAGAAGACGGCATAACGAGATCGTTT<br>CACGTGACTGGAGTTCAGACGTGTGCTCT<br>TCCG | This paper | N/A |
| Ribosome profiling: library amplification index primer:<br>CAAGCAGAAGACGGCATAACGAGATCGTGA<br>TGTGACTGGAGTTCAGACGTGTGCTCTTCC<br>G   | This paper | N/A |
| Ribosome profiling: library amplification index primer:<br>CAAGCAGAAGACGGCATAACGAGATGCCTA<br>AGTGACTGGAGTTCAGACGTGTGCTCTTC<br>CG   | This paper | N/A |
| Ribosome profiling: library amplification index primer:<br>CAAGCAGAAGACGGCATAACGAGATTCAAG<br>TGTGACTGGAGTTCAGACGTGTGCTCTTCC<br>G   | This paper | N/A |
| Ribosome profiling: library amplification index primer:<br>CAAGCAGAAGACGGCATAACGAGATCTGAT<br>CGTGACTGGAGTTCAGACGTGTGCTCTTC<br>CG   | This paper | N/A |
| Ribosome profiling: library amplification index primer:<br>CAAGCAGAAGACGGCATAACGAGATAAGCT<br>AGTGACTGGAGTTCAGACGTGTGCTCTTC<br>CG   | This paper | N/A |

|                                                                                                                                    |            |     |
|------------------------------------------------------------------------------------------------------------------------------------|------------|-----|
| Ribosome profiling: library amplification index primer:<br>CAAGCAGAAGACGGCATAACGAGATGTAGC<br>CGTGACTGGAGTTCAGACGTGTGCTCTTC<br>CG   | This paper | N/A |
| Ribosome profiling: library amplification index primer:<br>CAAGCAGAAGACGGCATAACGAGATAAGGC<br>CACGTGACTGGAGTTCAGACGTGTGCTCT<br>TCCG | This paper | N/A |
| Ribosome profiling: library amplification index primer:<br>CAAGCAGAAGACGGCATAACGAGATTCCGA<br>AACGTGACTGGAGTTCAGACGTGTGCTCTT<br>CCG | This paper | N/A |
| Ribosome profiling: library amplification index primer:<br>CAAGCAGAAGACGGCATAACGAGATTACGT<br>ACGGTGACTGGAGTTCAGACGTGTGCTCT<br>TCCG | This paper | N/A |
| Ribosome profiling: library amplification index primer:<br>CAAGCAGAAGACGGCATAACGAGATATCCA<br>CTCGTGACTGGAGTTCAGACGTGTGCTCTT<br>CCG | This paper | N/A |
| Ribosome profiling: library amplification index primer:<br>CAAGCAGAAGACGGCATAACGAGATATATC<br>AGTGTGACTGGAGTTCAGACGTGTGCTCTT<br>CCG | This paper | N/A |
| Ribosome profiling: library amplification index primer:<br>CAAGCAGAAGACGGCATAACGAGATAAAGG<br>AATGTGACTGGAGTTCAGACGTGTGCTCTT<br>CCG | This paper | N/A |
| Primer: mouse SPTLC1(C133W) forward:<br>TACCTGGGGTCCTCGAGGGTTCTATGGCA<br>CATTGA                                                    | This paper | N/A |
| Primer: mouse SPTLC1(C133W) reverse:<br>CGAGGACCCAGGTACCCACTCCGTA<br>CTTTAA                                                        | This paper | N/A |
| Primer: mouse SPTLC1(C133Y) forward:<br>GGTACCTATGGTCCTCGAGGGTTCTATGG<br>CACATT                                                    | This paper | N/A |

|                                                                                              |            |     |
|----------------------------------------------------------------------------------------------|------------|-----|
| Primer: mouse SPTLC1(C133Y) reverse:<br>AGGACCATAGGTACCCACTCCGTA CTTCTT<br>TAAAG             | This paper | N/A |
| Primer: mouse SPTLC1(V144D) forward:<br>TTTGATGACCATCTGGATTAGAAAGAGCGC<br>CTG                | This paper | N/A |
| Primer: mouse SPTLC1(V144D) reverse:<br>CAGATGGTCATCAAATGTGCCATAGAACCC<br>TCGAG              | This paper | N/A |
| Primer: <i>C. elegans</i> SPTL-1(C121W) forward:<br>GATCGTGGGGGCCACGTGGATTCTACGGA<br>ACTGTT  | This paper | N/A |
| Primer: <i>C. elegans</i> SPTL-1(C121W) reverse:<br>GTGGCCCCACGATCCTACGCCGTA CTTG<br>AAAATCG | This paper | N/A |
| Primer: <i>C. elegans</i> SPTL-1(C121Y) forward:<br>GGATCGTACGGGCCACGTGGATTCTACGG<br>AACTGTT | This paper | N/A |
| Primer: <i>C. elegans</i> SPTL-1(C121Y) reverse:<br>GTGGCCCGTACGATCCTACGCCGTA CTTG<br>AAAATC | This paper | N/A |

130

131

132 **Movie S1 (separate file).** The 3D reconstruction model of WT *Chlamydomonas* flagellum.

133 **Movie S2 (separate file).** The 3D reconstruction model of 5 nM Myr treated *Chlamydomonas*  
134 flagellum.

135 **Dataset S1 (separate file).** Log2FC of RNA-seq and Ribo-seq and TE for all genes during  
136 deflagellation.

137 **Dataset S2 (separate file).** Log2FC of RNA-seq and Ribo-seq and TE for the ciliary genes during  
138 deflagellation.

139 **Dataset S3 (separate file).** Genes with a similar translational pattern to the annotated ciliary  
140 genes and their orthologs.

141 **Dataset S4 (separate file).** Mass spec data analysis.

142

143

144

145

146

147
